# Supplementary figures and images for: Endangered plants persist under phosphorus limitation
Source: Springer Nature journal article supplement (doi:10.1038/nature03950), 2005-09-01

supplementary figure 1

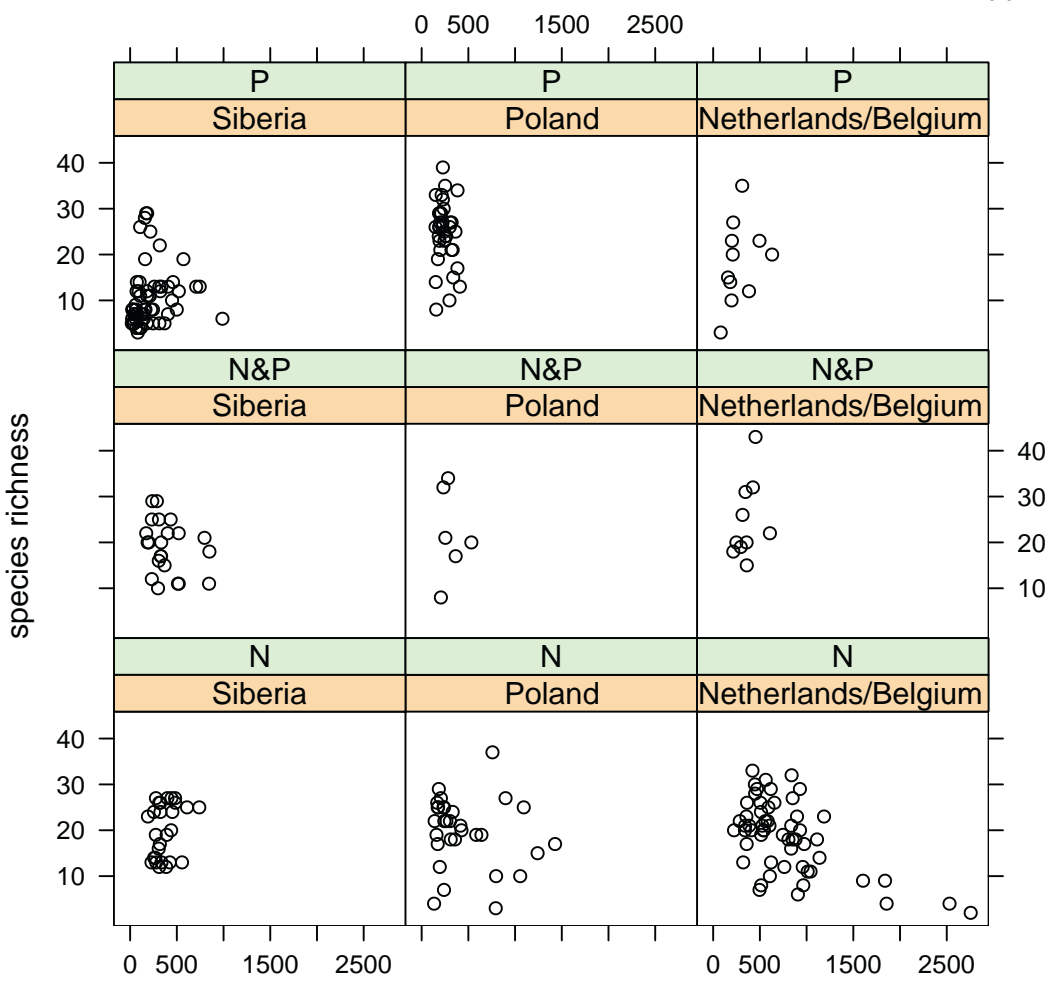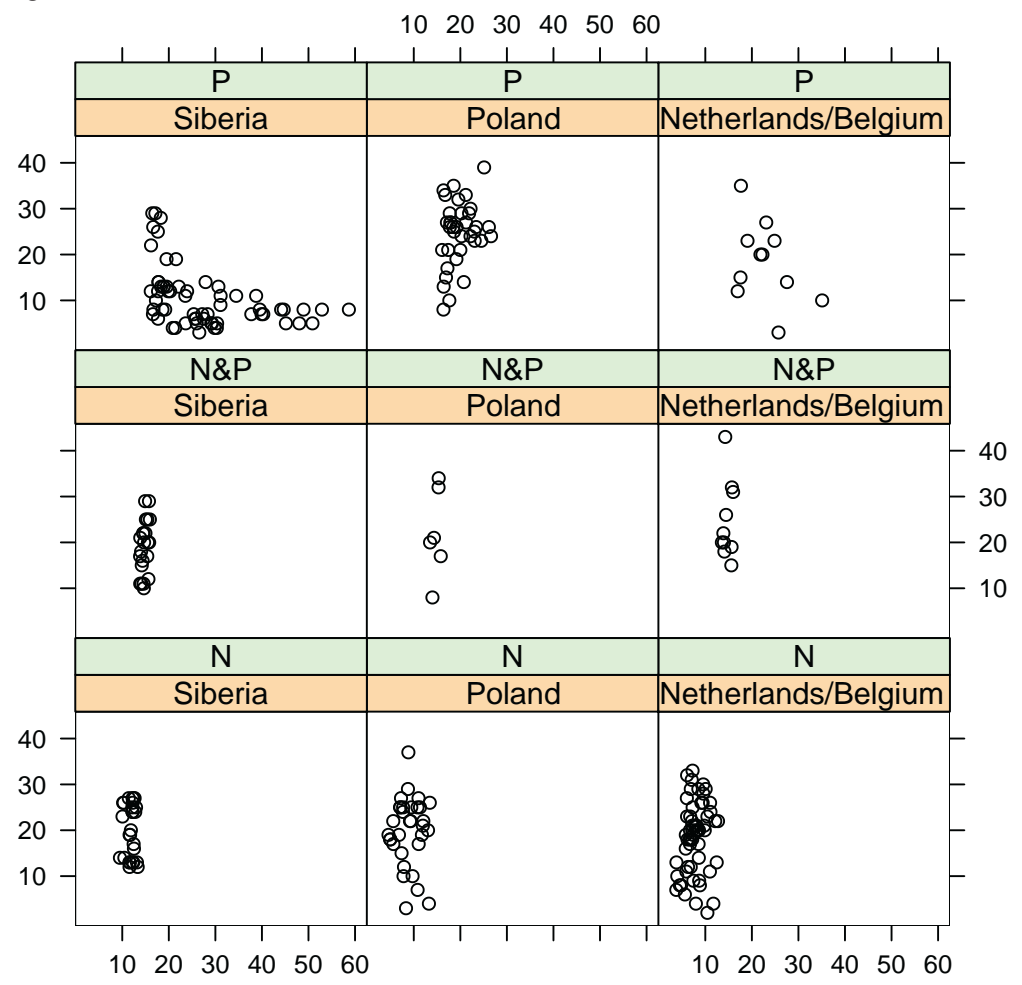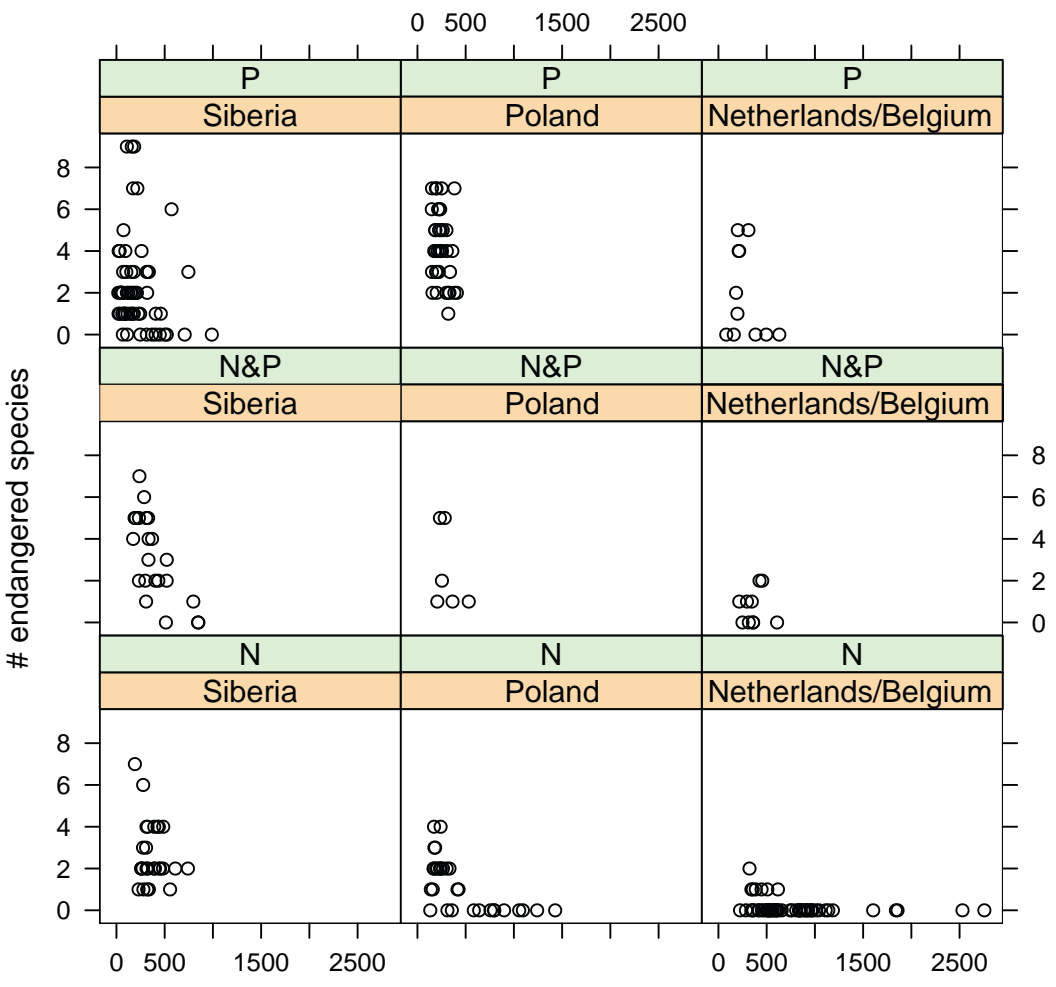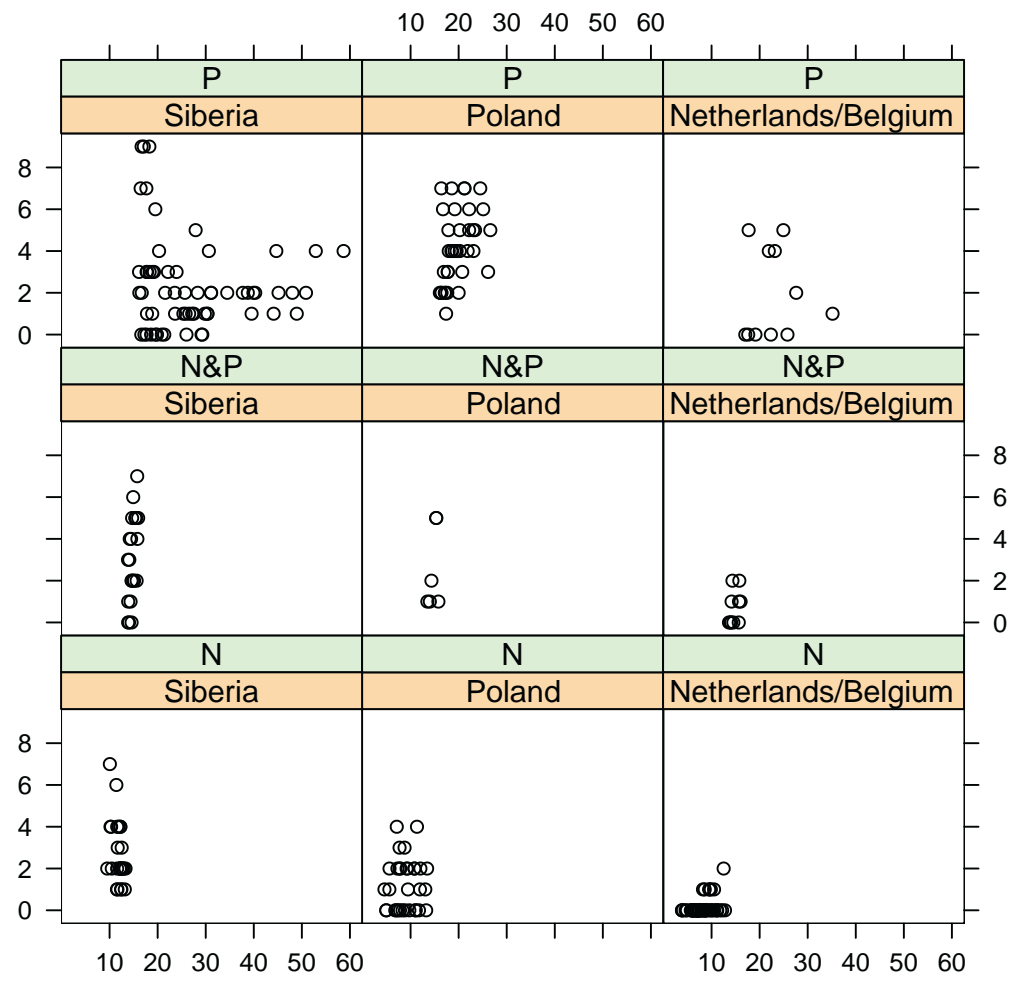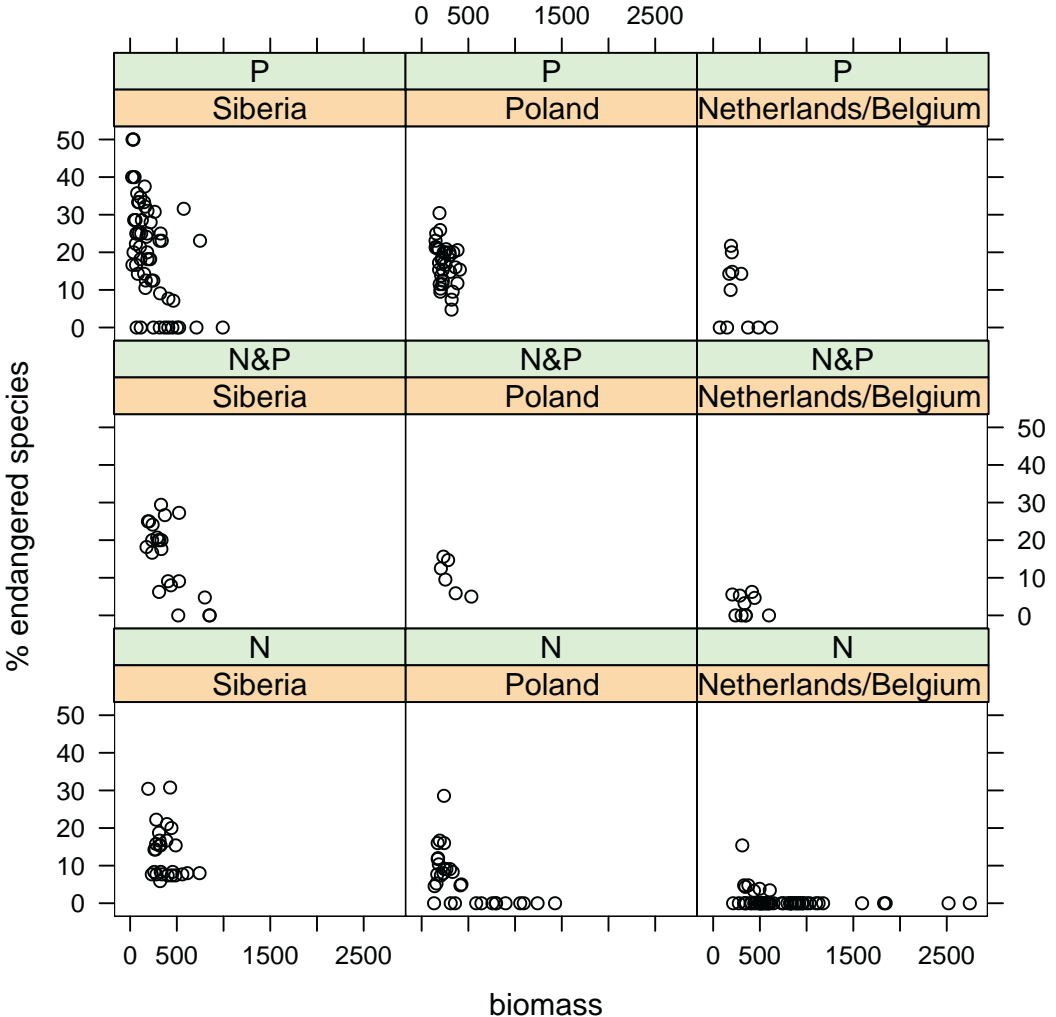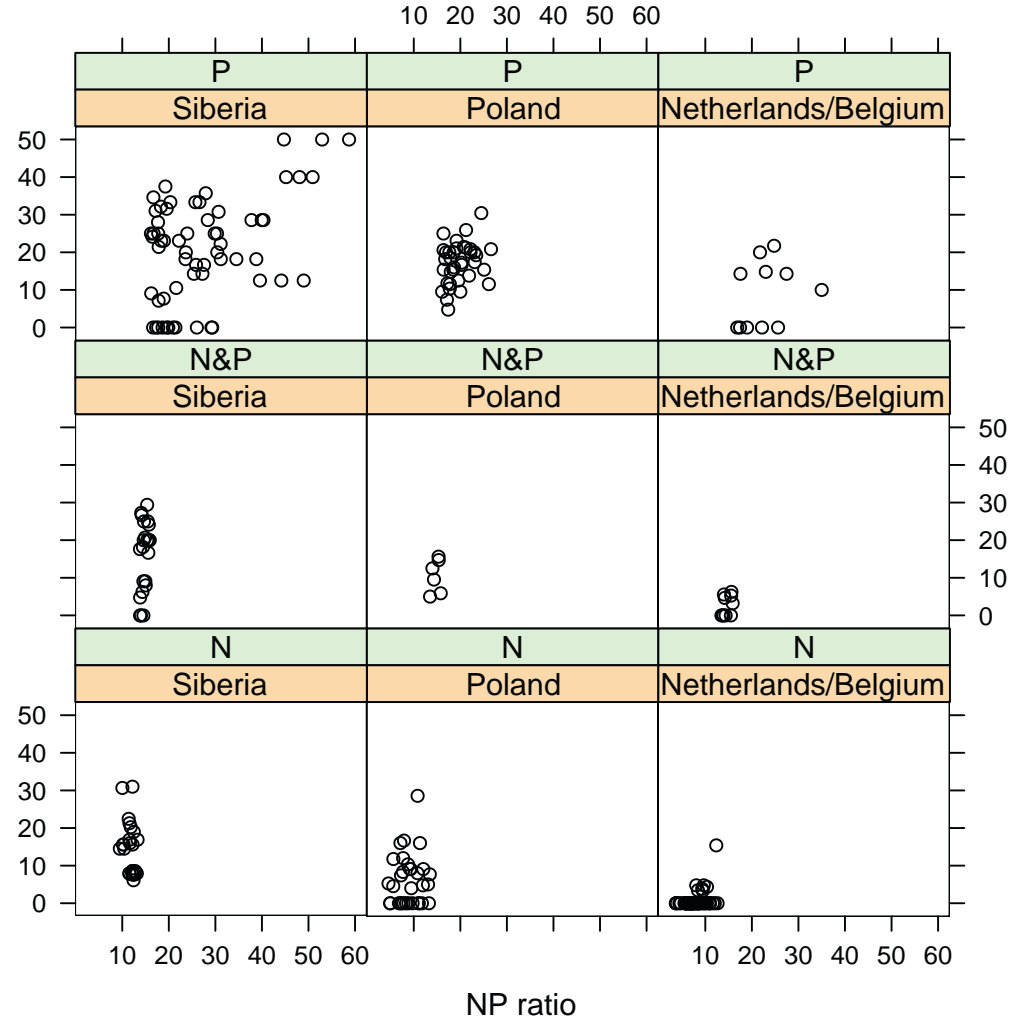

Supplement: 41586_2005_BFnature03950_MOESM2_ESM.pdf [file 41586_2005_BFnature03950_MOESM2_ESM.pdf]

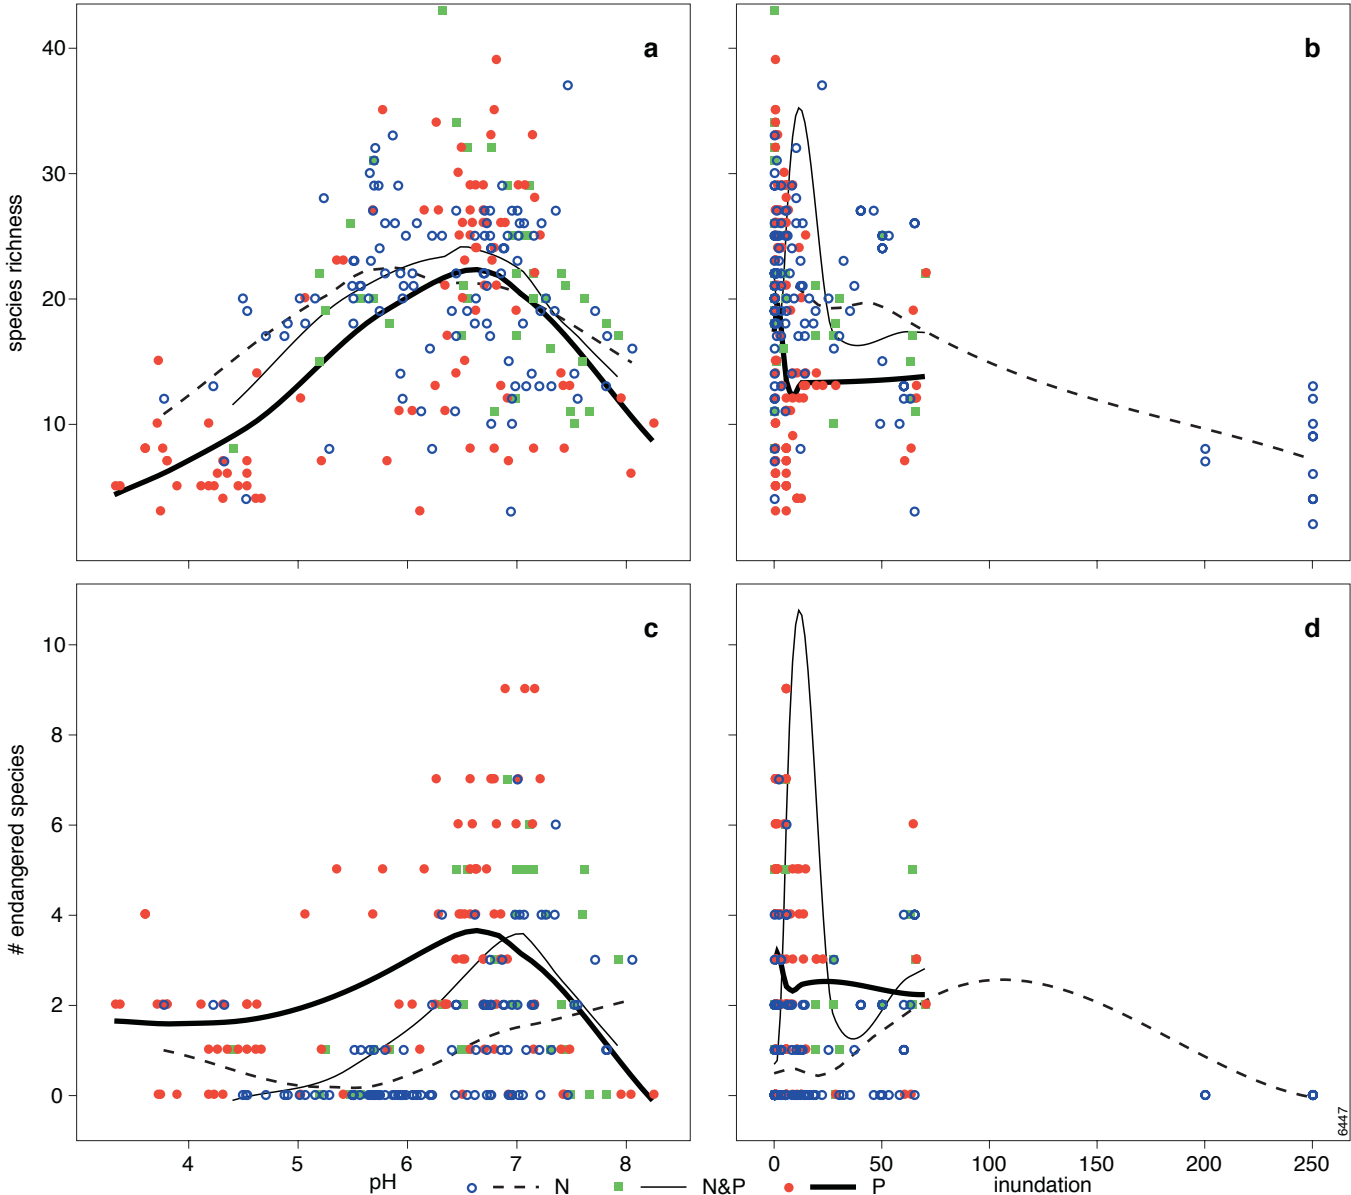

Supplement: 41586_2005_BFnature03950_MOESM3_ESM.pdf [file 41586_2005_BFnature03950_MOESM3_ESM.pdf]
